## RESEARCH ARTICLE

# Disparities in COVID-19 vaccine intentions, testing and trusted sources by household language for children with medical complexity

Laura P. Chen<sup>1\*</sup>, Kristina Singh-Verdeflor<sup>1</sup>, Michelle M. Kelly<sup>1</sup>, Daniel J. Sklansky<sup>1</sup>, Kristin A. Shadman<sup>1</sup>, M. Bruce Edmonson<sup>1</sup>, Qianqian Zhao<sup>2</sup>, Gregory P. DeMuri<sup>1</sup>, Ryan J. Collier<sup>1</sup>

**1** Department of Pediatrics, School of Medicine and Public Health, University of Wisconsin-Madison, Madison, Wisconsin, United States of America, **2** Department of Biostatistics and Medical Informatics, School of Medicine and Public Health, University of Wisconsin-Madison, Madison, Wisconsin, United States of America

\* [Lpchen@wisc.edu](mailto:Lpchen@wisc.edu)

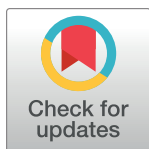

## OPEN ACCESS

**Citation:** Chen LP, Singh-Verdeflor K, Kelly MM, Sklansky DJ, Shadman KA, Edmonson MB, et al. (2024) Disparities in COVID-19 vaccine intentions, testing and trusted sources by household language for children with medical complexity. PLoS ONE 19(6): e0305553. <https://doi.org/10.1371/journal.pone.0305553>

**Editor:** Timothy Omara, BOKU: Universitat fur Bodenkultur Wien, AUSTRIA

**Received:** January 12, 2024

**Accepted:** June 2, 2024

**Published:** June 14, 2024

**Copyright:** © 2024 Chen et al. This is an open access article distributed under the terms of the [Creative Commons Attribution License](https://creativecommons.org/licenses/by/4.0/), which permits unrestricted use, distribution, and reproduction in any medium, provided the original author and source are credited.

**Data Availability Statement:** All relevant data are within the manuscript and its [Supporting information](#) files.

**Funding:** KSV, MMK, QZ, GPD, RJC: This work was, in part, funded by the National Institutes of Health (NIH) Agreement No. 1 OT2 HD107558-01 (award number OT2 HD107558). The views and conclusions contained in this document are those of the authors and should not be interpreted as representing the official policies, either expressed

## Abstract

### Objectives

Children with medical complexity experienced health disparities during the coronavirus disease 2019 (COVID-19) pandemic. Language may compound these disparities since people speaking languages other than English (LOE) also experienced worse COVID-19 outcomes. Our objective was to investigate associations between household language for children with medical complexity and caregiver COVID-19 vaccine intentions, testing knowledge, and trusted sources of information.

### Methods

This cross-sectional survey of caregivers of children with medical complexity ages 5 to 17 years was conducted from April-June 2022. Children with medical complexity had at least 1 Complex Chronic Condition. Households were considered LOE if they reported speaking any language other than English. Multivariable logistic regression examined associations between LOE and COVID-19 vaccine intentions, interpretation of COVID-19 test results, and trusted sources of information.

### Results

We included 1,338 caregivers of children with medical complexity (49% response rate), of which 133 (10%) had household LOE (31 total languages, 58% being Spanish). There was no association between household LOE and caregiver COVID-19 vaccine intentions. Caregivers in households with LOE had similar interpretations of positive COVID-19 test results, but significantly different interpretations of negative results. Odds of interpreting a negative test as expected (meaning the child does not have COVID-19 now or can still get the virus from others) were lower in LOE households (aOR [95% CI]: 0.56 [0.34–0.95]). Households

or implied, of the NIH. URL: <https://www.nih.gov/>  
Role of Funder/Sponsor: The funder had no role in the study design, data collection and analysis, decision to publish or preparation of the manuscript. There was no additional external funding received for this study.

**Competing interests:** The authors have declared that no competing interests exist.

**Abbreviations:** aOR, Adjusted odds ratio; CCC, Complex chronic condition; CI, Confidence interval; CMC, Children with medical complexity; COVID-19, Coronavirus disease 2019; LOE, Language other than English; RADx-UP, Rapid Acceleration of Diagnostics-Underserved Populations; STROBE, Strengthening the Reporting of Observational Studies in Epidemiology; US, United States.

with LOE were more likely to report trusting the US government to provide COVID-19 information (aOR [95% CI]: 1.86 [1.24–2.81]).

## Conclusion

Differences in COVID-19 test interpretations based on household language for children with medical complexity were observed and could contribute to disparities in outcomes. Opportunities for more inclusive public health messaging likely exist.

## Introduction

The COVID-19 pandemic has reinforced many healthcare disparities in the US [1]. Rates of COVID-19 vaccination, infection, hospitalization, and mortality illustrate stark inequities across racially and ethnically diverse populations [2–6], as well as those with chronic conditions [7–11]. Unfortunately, language disparities have further exacerbated inequities. Some patients who speak a language other than English (LOE) [12] have lower vaccine intentions, higher proportion of COVID-19 disease incidence, and a higher mortality rate; though these relationships likely vary across populations speaking different LOE [13–17].

While children have generally experienced less severe COVID-19 health consequences than adults [18], some pediatric groups, such as children with medical complexity (CMC) [19] are at greater risk. CMC are at high risk of both infection and poor outcomes from COVID-19 [20–24]. Early in the pandemic, CMC had 8 times higher risk of hospitalization from COVID-19 and comprised a high proportion of patients admitted to pediatric intensive care units [8, 25]. Since parent language has been associated with poor health care outcomes, such as lack of insurance and decreased health care access for children with special health care needs [26–29], it is possible that household language may worsen existing COVID-19 health disparities for CMC.

The purpose of this study was to investigate the association between CMC household language and caregiver perceptions around COVID-19 vaccination, testing, and trusted information sources. Our hypothesis was that in the CMC population, LOE status may promote disparities in COVID-19-related perceptions that may influence their health outcomes. Different perceptions based on household language may have important implications for designing public health interventions related to COVID-19 and other viral respiratory illnesses for CMC.

## Methods

### Study design, setting, and participants

This was a cross-sectional analysis of survey data from caregivers of CMC (“caregivers”) recruited from a large Midwestern United States academic medical center from April 1, 2022 to June 30, 2022. The survey was conducted as part of the National Institutes of Health’s Rapid Acceleration of Diagnostics-Underserved Populations (RADx-UP) program, which aims “to ensure that all Americans have access to COVID-19 testing, with a focus on communities most affected by the pandemic” [30]. This study reports data from the most recent of three data collection periods, following the Strengthening the Reporting of Observational Studies in Epidemiology (STROBE) reporting statement. Eligible participants were identified via the electronic medical record based on the following criteria: at least 18 years of age and cared for CMC between 5–17 years old, attended school before March 2020, had at least 2 encounters at

our medical center in 2020, at least 1 complex chronic condition (CCC), and had an address in the electronic medical record. CCCs are any medical condition that can be reasonably expected to last at least 12 months (unless death intervenes) and involve several different organ systems or 1 organ system severely enough to require specialty care and probable hospitalization at a tertiary care center [31].

Individuals were invited to participate in this survey via mailing coordinated by our university survey center. Eligible caregivers received a \$5 incentive with each survey; caregivers that completed surveys received \$50. Up to 3 surveys were mailed to each participant. Caregivers that participated in prior data collection periods could elect to receive the survey by email. Surveys were available in English and Spanish; participants whose children were identified in the electronic medical record as Spanish-speaking were mailed a survey in Spanish. This study was approved by the University of Wisconsin-Madison's institutional review board (#2021-0515) and participant written informed consent was obtained electronically or by mail. The survey was comprised of questions from the RADx-UP common data elements library [30], a bank of publicly available, standardized questions including respondent and family demographics, social determinants of health, medical history, and COVID-19 perceptions and practices (including vaccination, testing, and trusted sources of information).

### Outcomes, exposure, and covariates

The first dependent variable of interest was COVID-19 vaccine intentions, defined dichotomously as present if caregivers responded "yes" to "Has your child received a COVID-19 vaccine?" or responded "very likely" to "How likely is your child to get an approved COVID-19 vaccine when it becomes available?" Vaccine intention was defined as absent if caregivers responded "no" to "Has your child received a COVID-19 vaccine?" and responded anything other than "very likely" to "How likely is your child to get an approved COVID-19 vaccine when it becomes available?"

The second dependent variable of interest was COVID-19 test result interpretation, defined as present if caregivers responded as expected to two scenarios: "If my child gets a positive test result. . ." and "If my child gets a negative test result. . .". Expected response for a positive test result was choosing both 1) "My child will need to isolate themselves from others" and 2) "My child will not be able to attend school". Expected response for a negative test result was choosing "My child doesn't have COVID-19 now" and not choosing "My child can be around others without getting the virus from them." The RADx-UP common data elements test perceptions questions do not distinguish between specific tests such a rapid antigen or polymerase chain reaction.

Caregiver sources of trust for pandemic information were assessed as secondary outcomes to guide potential public health messaging strategies that might best influence primary outcomes. Trust was defined as present if caregivers responded "a great deal" to the question, "How much do you trust each of these sources to provide correct information about COVID-19 as it relates to your child?" Information sources included your doctor or health care provider, faith leader, close friends and members of your family, people you go to work or class with or people you know, your contacts on social media, the US government, and the US Coronavirus Task Force. Trust was defined as absent if caregivers responded, "not at all", "a little", "somewhat" or "don't know".

The exposure of interest was LOE status. Households were defined as having LOE if they answered "yes" to "Do you speak a language other than English at home?" Covariates were modeled categorically and included child's age, health insurance, number of CCCs (1 vs  $\geq 2$ ), hospital encounters in the year before enrollment (0 vs  $\geq 1$ ), caregiver's highest level of

education, annual household income, and perceived severity of COVID-19 for their child. In the primary outcome analysis, we included sources of trust for COVID-19 information as a covariate.

## Analysis

Participant demographic and clinical characteristics are summarized by descriptive statistics. Bivariable followed by multivariable logistic regression models estimated associations between the dependent variable, exposure of interest, and covariates. After confirming no collinearity (all Variance Inflation Factors were  $<1.5$ ) and model stability, covariates with statistically significant bivariable associations with the primary outcomes were included in multivariable models. We also included *a priori* selected covariates that were suggested by prior published research as potential confounders, regardless of statistical significance in the bivariable models [32, 33]. Due to the small sample size, we did not evaluate for interactions. To explore the potential influence of response bias, a sensitivity analysis was conducted using Chi-squared tests to assess differences between respondents and nonrespondents, using available data from the creation of the eligible cohort (S1 Table). Using these variables, we also created propensity scores to assess the probability of survey response using logistic regression models [34]. The primary analysis was repeated with inverse probability weighting by applying these propensity scores.

Sample size was estimated from the parent study [35], where  $n = 900$  would have adequate power to detect moderate effect sizes ( $1.5 \leq OR \leq 2.0$ ) at the two-sided 0.05 significance level in cross-sectional logistic regression models predicting binary outcomes with 80% power under various scenarios and binary predictors ( $x = 0$ - absent/ $x = 1$ - present). Analyses were conducted in SASv.9.4. P-values  $<0.05$  were considered statistically significant.

## Results

### Participant characteristics and household language

Among 2,897 mailed surveys, 1,432 caregivers returned surveys (49% response rate) and 1,338 (46%) responded to the outcome questions (Table 1). Regarding household language, 133 (10%) of respondents reported LOE, of which 58% identified Spanish, 8% Mandarin, and 7% American Sign Language, in addition to 28 other unique languages.

Child characteristics in households with and without LOE were similar, including child sex, age, number of CCCs, hospital encounters in the prior year, and prior positive COVID-19 test. Just over one-quarter of CMC had  $\geq 2$  CCCs and nearly 20% had hospital encounters in 2020.

Caregiver characteristics differed more between households with and without LOE. For example, households reporting LOE had a greater proportion of caregivers with lower education level, lower income and public insurance.

Respondents and non-respondents had similar child characteristics for age, sex, and number of complex chronic conditions. However, a higher proportion of respondents identified as non-Hispanic white and utilized private insurance as compared to non-respondents (S1 Table).

### Primary outcomes and LOE status: COVID-19 vaccine intentions and testing

No significant associations between household LOE and COVID-19 vaccine intentions were observed (adjusted odds ratio, aOR [95%CI]: 1.28 [0.74–2.23] between LOE and non-LOE groups) (Table 2). COVID-19 vaccine intentions were 80% in both households with and

**Table 1. Demographic and clinical characteristics of caregivers and children overall and by language other than English (LOE) status.**

|                                      | All<br>n (col %) | LOE<br>n (col %) | Not LOE<br>n (col %) |
|--------------------------------------|------------------|------------------|----------------------|
| Total, <i>n</i> (row %)              | 1338 (100)       | 133 (10)         | 1205 (90)            |
| <b>Caregiver Characteristics</b>     |                  |                  |                      |
| Age                                  |                  |                  |                      |
| Median (IQR)                         | 43 (39–48)       | 43 (37–50)       | 43 (39–47)           |
| Caregiver Race and Ethnicity         |                  |                  |                      |
| White, Non-Hispanic                  | 1174 (88)        | 51 (38)          | 1123 (93)            |
| Hispanic                             | 71 (5)           | 52 (39)          | 19 (2)               |
| Black, Non-Hispanic                  | 22 (2)           | 6 (5)            | 16 (1)               |
| Other race, Non-Hispanic             | 44 (3)           | 21 (16)          | 23 (2)               |
| Multiracial, Non-Hispanic            | 14 (1)           | 2 (1)            | 12 (1)               |
| Not reported                         | 13 (1)           | 1 (1)            | 12 (1)               |
| Primary Language                     |                  |                  |                      |
| English                              | 1205 (90)        | 0                | 1205 (100)           |
| Spanish                              | 77 (6)           | 77 (58)          | 0                    |
| Mandarin                             | 11 (1)           | 11 (8)           | 0                    |
| American Sign Language               | 9 (1)            | 9 (7)            | 0                    |
| Other                                | 36 (2)           | 36 (27)          | 0                    |
| Highest Education                    |                  |                  |                      |
| < 12th Grade                         | 29 (2)           | 16 (12)          | 13 (1)               |
| GED or Some College                  | 480 (36)         | 47 (36)          | 433 (36)             |
| Bachelor's Degree                    | 470 (35)         | 31 (23)          | 439 (36)             |
| Advanced Degree                      | 359 (27)         | 39 (29)          | 320 (27)             |
| Income                               |                  |                  |                      |
| < \$35,000                           | 150 (11)         | 23 (17)          | 127 (11)             |
| \$35,000–\$49,999                    | 94 (7)           | 15 (11)          | 79 (7)               |
| \$50,000–\$74,999                    | 182 (14)         | 22 (17)          | 160 (13)             |
| \$75,000–\$99,999                    | 199 (15)         | 16 (12)          | 183 (15)             |
| > \$100,000                          | 567 (42)         | 34 (26)          | 533 (44)             |
| Not Reported                         | 146 (11)         | 23 (17)          | 123 (10)             |
| Primary Insurance Type <sup>1</sup>  |                  |                  |                      |
| Public Insurances                    | 486 (36)         | 62 (47)          | 424 (35)             |
| Private Insurances                   | 821 (61)         | 60 (45)          | 761 (63)             |
| Other Insurances                     | 31 (3)           | 11 (8)           | 20 (2)               |
| <b>Child Characteristics</b>         |                  |                  |                      |
| Sex                                  |                  |                  |                      |
| Male                                 | 702 (52)         | 72 (54)          | 630 (52)             |
| Female                               | 629 (47)         | 59 (44)          | 570 (47)             |
| Other                                | 7 (1)            | 2 (2)            | 5 (1)                |
| Age                                  |                  |                  |                      |
| < 12 years old                       | 540 (40)         | 60 (45)          | 480 (40)             |
| ≥ 12 years old                       | 798 (60)         | 73 (55)          | 725 (60)             |
| Number of Complex Chronic Conditions |                  |                  |                      |
| 1                                    | 948 (71)         | 100 (75)         | 848 (70)             |
| 2 or more                            | 390 (29)         | 33 (25)          | 357 (30)             |
| Hospital Admissions in 2020          |                  |                  |                      |
| 0                                    | 1095 (82)        | 108 (81)         | 987 (82)             |

(Continued)

**Table 1.** (Continued)

|                                   | All<br>n (col %) | LOE<br>n (col %) | Not LOE<br>n (col %) |
|-----------------------------------|------------------|------------------|----------------------|
| 1 or more                         | 243 (18)         | 25 (19)          | 218 (18)             |
| Ever Tested Positive for COVID-19 |                  |                  |                      |
| Yes                               | 456 (34)         | 51 (38)          | 405 (34)             |
| No                                | 787 (59)         | 74 (56)          | 713 (59)             |
| Missing                           | 95 (7)           | 8 (6)            | 87 (7)               |

<sup>1</sup>The 'Public Insurances' category includes participants with both public and private insurance. The 'Other Insurances' category includes participants who selected "Does not have health insurance", "Don't Know", or "Prefer not to answer."

<https://doi.org/10.1371/journal.pone.0305553.t001>

without LOE (Table 3). Households with LOE were significantly less likely to interpret negative COVID-19 test results as expected (aOR [95% CI]: 0.56 [0.34–0.95]). Specifically, households with LOE were significantly more likely to report that a negative test means that their child can be around others without getting the virus from them ( $P < 0.0001$ , Table 3). Households with and without LOE had no statistically significant difference in interpretation of positive test results (Table 2). Results of the propensity-weighted sensitivity analyses were consistent with the unweighted analysis (S2 Table).

### Primary outcomes and covariate associations

In multivariable models, study outcomes were associated with several covariates (Table 2). Vaccine intentions were associated with higher education, older child age, more CCCs and greater perceived severity of illness from COVID-19. Notably, the largest effect sizes were observed with trusted sources being your doctor or healthcare provider (3.46 [2.34–5.12]) and the US Coronavirus Task Force (7.66 [4.93–11.89]). Expected interpretation of positive COVID-19 test results had similar associations as vaccine intentions, although they were less consistent and lower magnitude. Expected interpretation of negative COVID-19 test results was associated with higher income, more CCCs, and trusted source being ones doctor or healthcare provider.

### Secondary outcome and LOE status: COVID-19 sources of trust

Caregiver respondents from households with LOE were significantly more likely to trust the US government as a source of COVID-19 information as compared to those from non-LOE households (aOR [95% CI]: 1.86 [1.24–2.81]) (Table 4). However, most caregivers had low trust in the US government (64% LOE households and 74% non-LOE households reported absent trust). We observed no association between household LOE and trust in doctor/healthcare provider, faith leader, close friends/families, social media contacts or US Coronavirus Task Force. Similar levels of high trust in doctor or health care provider were reported by LOE and non-LOE caregivers (83% and 87%, respectively).

### Discussion

This cross-sectional survey of caregivers from Spring 2022 observed high vaccine intentions in households of CMC with and without LOE; however, interpretations of COVID-19 test results and trusted information sources varied. As national pandemic attention shifts towards living with COVID-19, vaccine and test perceptions have important implications due to their central

**Table 2. Adjusted odds ratio between language other than English (LOE) status and three primary outcomes: Vaccine intentions, positive COVID-19 test perceptions, and negative COVID-19 test perceptions.**

|                                                                                                                 | Outcomes <sup>1</sup> |                                    |                                    |
|-----------------------------------------------------------------------------------------------------------------|-----------------------|------------------------------------|------------------------------------|
|                                                                                                                 | Vaccine Intentions    | Positive COVID-19 Test Perceptions | Negative COVID-19 Test Perceptions |
|                                                                                                                 | Adjusted OR (95% CI)  | Adjusted OR (95%CI)                | Adjusted OR (95%CI)                |
| <b>Household Language Other Than English</b>                                                                    | 1.28 (0.74, 2.23)     | 1.27 (0.73, 2.22)                  | 0.56 (0.34, 0.95)*                 |
| <b>Covariates</b>                                                                                               |                       |                                    |                                    |
| <b>Education</b> (Referent: GED or Some College)                                                                |                       |                                    |                                    |
| < 12 <sup>th</sup> grade                                                                                        | 2.67 (0.80, 8.89)     | 0.38 (0.15, 0.97)*                 | 0.71 (0.27, 1.89)                  |
| Bachelor’s Degree                                                                                               | 1.11 (0.75, 1.64)     | 1.39 (0.94, 2.07)                  | 1.18 (0.74, 1.87)                  |
| Advanced Degree                                                                                                 | 1.66 (1.01, 2.75)*    | 1.13 (0.72, 1.76)                  | 1.18 (0.68, 2.06)                  |
| <b>Income</b> (Referent: \$50,000 –\$74,999)                                                                    |                       |                                    |                                    |
| < \$35,000                                                                                                      | 0.38 (0.21, 0.71)*    | 1.57 (0.81, 3.03)                  | 1.08 (0.55, 2.12)                  |
| \$35,000–\$49,999                                                                                               | 0.53 (0.27, 1.05)     | 1.29 (0.62, 2.69)                  | 1.72 (0.75, 3.95)                  |
| \$75,000–\$99,999                                                                                               | 0.84 (0.47, 1.49)     | 0.94 (0.53, 1.64)                  | 1.23 (0.65, 2.30)                  |
| ≥ \$100,000                                                                                                     | 1.51 (0.87, 2.63)     | 1.12 (0.67, 1.87)                  | 1.83 (1.02, 3.29)*                 |
| Not Reported                                                                                                    | 0.61 (0.33, 1.11)     | 0.88 (0.49, 1.58)                  | 1.48 (0.75, 2.91)                  |
| <b>Child’s Health Insurance</b> (Referent: Private)                                                             |                       |                                    |                                    |
| Public Insurances <sup>2</sup>                                                                                  | 1.20 (0.81, 1.79)     | 1.04 (0.71, 1.52)                  | 1.18 (0.75, 1.87)                  |
| Other Insurances                                                                                                | 0.57 (0.21, 1.55)     | 0.51 (0.21, 1.26)                  | 0.46 (0.18, 1.2)                   |
| <b>Child Age</b> (Referent: ≥ 12 years old)                                                                     |                       |                                    |                                    |
| < 12 years old                                                                                                  | 0.37 (0.27, 0.51)*    | 0.95 (0.70, 1.30)                  | 0.91 (0.63, 1.32)                  |
| <b>Complex Chronic Conditions</b> (Referent: 1 CCC)                                                             |                       |                                    |                                    |
| ≥ 2 CCCs                                                                                                        | 1.50 (1.03, 2.18)*    | 0.75 (0.53, 1.06)                  | 1.81 (1.16, 2.85)*                 |
| <b>Expected likelihood of severe health effects due to COVID-19</b> (Referent: Not at all likely)               |                       |                                    |                                    |
| A little likely, Somewhat likely                                                                                | 1.15 (0.81, 1.64)     | 1.80 (1.29, 2.50)*                 | 1.55 (1.04, 2.31)*                 |
| Very likely, Extremely likely                                                                                   | 2.23 (1.26, 3.94)*    | 1.98 (1.15, 3.41)*                 | 0.88 (0.5, 1.54)                   |
| <b>Hospital Encounters in 2020</b> (Referent: 0)                                                                |                       |                                    |                                    |
| ≥ 1 Hospital Encounter                                                                                          | 0.83 (0.56, 1.25)     | 1.43 (0.93, 2.20)                  | 0.85 (0.54, 1.36)                  |
| <b>High trust in the following sources for correct COVID-19 information</b> (Referent: Less trust) <sup>3</sup> |                       |                                    |                                    |
| Your doctor or healthcare provider                                                                              | 3.46 (2.34, 5.12)*    | 1.63 (1.07, 2.49)*                 | 2.51 (1.58, 3.97)*                 |
| The US Coronavirus Task Force                                                                                   | 7.66 (4.93, 11.89)*   | 1.40 (0.99, 1.96)                  | 1.22 (0.81, 1.83)                  |
| Close friends and family members                                                                                | 0.74 (0.49, 1.13)     | 0.79 (0.52, 1.18)                  | 0.69 (0.43, 1.09)                  |

<sup>1</sup>Outcomes:

Vaccine Intentions = Child has received at least 1 COVID-19 vaccine or the caregiver responded “very likely” to the question, “How likely is your child to get an approved COVID-19 vaccine when it becomes available?”

Positive COVID-19 Test Perceptions = In response to “If my child gets a positive result, it means. . .”, caregiver selects “My child will need to isolate themselves from others” and “My child will not be able to attend school.”

Negative COVID-19 Test Perceptions = In response to “If my child gets a negative result, it means. . .”, caregiver selects “My child doesn’t have COVID-19 now” and does not select “My child can be around others without getting the virus from them.”

<sup>2</sup>The ‘Public Insurances’ category includes participants with both public and private insurance. The ‘Other Insurances’ category includes participants who selected “Does not have health insurance”, “Don’t Know”, or “Prefer not to answer.”

<sup>3</sup>In response to “How much do you trust each of these sources to provide correct information about COVID 19 as it relates to your child?”, trust is dichotomized as High = “A great deal” and Less = “Not at all”, “A little”, “Somewhat”, and “Don’t Know”

\* Significant Association

<https://doi.org/10.1371/journal.pone.0305553.t002>

**Table 3. Outcome frequencies for COVID-19 vaccine intentions, COVID-19 testing perceptions, and level of trust in various sources for COVID-19 information by language other than English (LOE) status.**

|                                                                                  | LOE<br>n (col %) | Not LOE<br>n (col %) | $\chi^2$ p-value |
|----------------------------------------------------------------------------------|------------------|----------------------|------------------|
| Total, n (row %)                                                                 | 133 (10)         | 1205 (90)            |                  |
| <b>COVID-19 Vaccine Intention &amp; Practices</b>                                |                  |                      |                  |
| Child is vaccinated or is very likely to be vaccinated for COVID-19 <sup>1</sup> |                  |                      |                  |
| Yes                                                                              | 107 (80)         | 966 (80)             | 0.9376           |
| No                                                                               | 26 (20)          | 239 (20)             |                  |
| <b>COVID-19 Test Perceptions</b>                                                 |                  |                      |                  |
| If my child gets a <b>positive result</b> , it means:                            |                  |                      |                  |
| My child will need to isolate themselves from others                             | 116 (87)         | 1046 (87)            | 0.8936           |
| My child will not be able to attend school                                       | 126 (95)         | 1155 (96)            | 0.5461           |
| If my child gets a <b>negative test result</b> , it means:                       |                  |                      |                  |
| My child doesn't have COVID-19 now                                               | 119 (89)         | 1118 (93)            | 0.1707           |
| My child can be around others without getting the virus from them                | 16 (12)          | 33 (3)               | < .0001*†        |
| <b>Trust in Pandemic Information Sources<sup>2,3</sup></b>                       |                  |                      |                  |
| Your doctor or health care provider, n = 1338                                    |                  |                      |                  |
| High                                                                             | 110 (83)         | 1046 (87)            | 0.1908           |
| Low                                                                              | 23 (17)          | 159 (13)             |                  |
| Your faith leader, n = 1293                                                      |                  |                      |                  |
| High                                                                             | 20 (15)          | 116 (10)             | 0.0616           |
| Low                                                                              | 111 (85)         | 1046 (90)            |                  |
| Your close friends and members of your family, n = 1338                          |                  |                      |                  |
| High                                                                             | 29 (22)          | 188 (16)             | 0.0655           |
| Low                                                                              | 104 (78)         | 1017 (84)            |                  |
| People at work/ class or other people you know, n = 1336                         |                  |                      |                  |
| High                                                                             | 17 (13)          | 133 (11)             | 0.5496           |
| Low                                                                              | 116 (87)         | 1070 (89)            |                  |
| Your contacts on social media, n = 1332                                          |                  |                      |                  |
| High                                                                             | 3 (2)            | 31 (3)               | 1.0000†          |
| Low                                                                              | 129 (98)         | 1169 (97)            |                  |
| The US government, n = 1331                                                      |                  |                      |                  |
| High                                                                             | 47 (35)          | 312 (26)             | 0.0108*          |
| Low                                                                              | 82 (64)          | 890 (74)             |                  |
| The US Coronavirus Task Force, n = 1338                                          |                  |                      |                  |
| High                                                                             | 62 (47)          | 568 (47)             | 0.9092           |
| Low                                                                              | 71 (53)          | 637 (53)             |                  |

<sup>1</sup>Outcome is defined as the child has received at least 1 COVID-19 vaccine or the caregiver responded "very likely" to the question, "How likely is your child to get an approved COVID-19 vaccine when it becomes available?"

<sup>2</sup>In response to "How much do you trust each of these sources to provide correct information about COVID 19 as it relates to your child?", trust is dichotomized as High = "A great deal" and Less = "Not at all", "A little", "Somewhat", and "Don't Know"

<sup>3</sup>Sample sizes for the trust variables may be smaller than the total sample size due to missing observations.

\* Significant association

† Fisher's Exact Test

<https://doi.org/10.1371/journal.pone.0305553.t003>



**Table 4. Adjusted odds ratio between language other than English (LOE) status and a high level of trust in various sources for COVID-19 information.**

|                                                                                                   | Trust in the following sources to provide correct information about COVID 19 as it relates to your child <sup>1</sup> |                     |                          |                           |                       |                     |                             |
|---------------------------------------------------------------------------------------------------|-----------------------------------------------------------------------------------------------------------------------|---------------------|--------------------------|---------------------------|-----------------------|---------------------|-----------------------------|
|                                                                                                   | Doctor or Healthcare Provider                                                                                         | Faith Leader        | Close Friends and Family | Work or School Colleagues | Social Media Contacts | U.S. Government     | U.S. Coronavirus Task Force |
|                                                                                                   | Adjusted OR (95% CI)                                                                                                  | Adjusted OR (95%CI) | Adjusted OR (95%CI)      | Adjusted OR (95%CI)       | Adjusted OR (95%CI)   | Adjusted OR (95%CI) | Adjusted OR (95% CI)        |
| <b>Household Language Other Than English</b>                                                      | 0.84 (0.50, 1.41)                                                                                                     | 1.32 (0.76, 2.29)   | 1.26 (0.78, 2.02)        | 1.02 (0.58, 1.81)         | 0.55 (0.15, 2.03)     | 1.86 (1.24, 2.81)*  | 1.14 (0.77, 1.69)           |
| <b>Covariates</b>                                                                                 |                                                                                                                       |                     |                          |                           |                       |                     |                             |
| <b>Education</b> (Referent: GED or some college)                                                  |                                                                                                                       |                     |                          |                           |                       |                     |                             |
| < 12 <sup>th</sup> grade                                                                          | 2.46 (0.81, 7.47)                                                                                                     | 1.11 (0.39, 3.11)   | 1.41 (0.58, 3.40)        | 1.80 (0.63, 5.14)         | 2.03 (0.47, 8.75)     | 1.18 (0.42, 3.29)   | 1.18 (0.50, 2.76)           |
| Bachelor’s degree                                                                                 | 1.46 (0.98, 2.16)                                                                                                     | 0.75 (0.47, 1.19)   | 0.85 (0.58, 1.24)        | 0.84 (0.53, 1.33)         | 0.23 (0.07, 0.73)*    | 1.56 (1.10, 2.19)*  | 1.97 (1.47, 2.63)*          |
| Advanced degree                                                                                   | 2.23 (1.33, 3.75)*                                                                                                    | 0.59 (0.34, 1.02)   | 0.82 (0.53, 1.27)        | 1.14 (0.70, 1.86)         | 0.52 (0.18, 1.51)     | 2.35 (1.63, 3.39)*  | 3.13 (2.25, 4.34)*          |
| <b>Income</b> (Referent: \$50,000 –\$74,999)                                                      |                                                                                                                       |                     |                          |                           |                       |                     |                             |
| < \$35,000                                                                                        | 1.26 (0.69, 2.30)                                                                                                     | 1.11 (0.57, 2.15)   | 1.45 (0.82, 2.56)        | 1.21 (0.61, 2.41)         | 1.87 (0.59, 5.94)     | 0.87 (0.49, 1.54)   | 0.84 (0.52, 1.36)           |
| \$35,000 –\$49,999                                                                                | 1.36 (0.67, 2.73)                                                                                                     | 1.25 (0.61, 2.57)   | 1.17 (0.61, 2.23)        | 0.79 (0.34, 1.82)         | 0.65 (0.12, 3.52)     | 0.68 (0.36, 1.29)   | 0.63 (0.37, 1.08)           |
| \$75,000 –\$99,999                                                                                | 1.05 (0.59, 1.85)                                                                                                     | 0.62 (0.30, 1.27)   | 0.72 (0.40, 1.29)        | 0.95 (0.50, 1.79)         | 0.85 (0.22, 3.35)     | 0.92 (0.57, 1.49)   | 0.74 (0.48, 1.12)           |
| ≥ \$100,000                                                                                       | 1.79 (1.04, 3.07)*                                                                                                    | 0.78 (0.43, 1.41)   | 0.94 (0.58, 1.55)        | 0.80 (0.45, 1.40)         | 0.79 (0.23, 2.69)     | 1.26 (0.83, 1.91)   | 1.04 (0.72, 1.52)           |
| Not reported                                                                                      | 0.69 (0.39, 1.21)                                                                                                     | 0.91(0.46, 1.83)    | 0.71 (0.38, 1.33)        | 0.83 (0.41, 1.68)         | 0.64 (0.14, 2.88)     | 0.49 (0.27, 0.87)*  | 0.47 (0.29, 0.75)*          |
| <b>Child’s Health Insurance</b> (Referent: Private)                                               |                                                                                                                       |                     |                          |                           |                       |                     |                             |
| Public Insurances <sup>2</sup>                                                                    | 0.63 (0.42, 0.93)*                                                                                                    | 1.25 (0.80, 1.96)   | 1.08 (0.74, 1.57)        | 0.83 (0.54, 1.29)         | 1.07 (0.43, 2.65)     | 1.00 (0.73, 1.38)   | 0.86 (0.65, 1.14)           |
| Other Insurances                                                                                  | 0.21 (0.09, 0.52)*                                                                                                    | 1.88 (0.65, 5.47)   | 2.91 (1.24, 6.83)*       | 1.26 (0.41, 3.91)         | 2.22 (0.36, 13.65)    | 1.17 (0.45, 3.05)   | 0.80 (0.34, 1.85)           |
| <b>Child Age</b> (Referent: ≥ 12 years old)                                                       |                                                                                                                       |                     |                          |                           |                       |                     |                             |
| < 12 years old                                                                                    | 1.11 (0.79, 1.55)                                                                                                     | 1.41 (0.98, 2.02)   | 0.98 (0.72, 1.33)        | 1.39 (0.98, 1.96)         | 0.63 (0.29, 1.35)     | 1.00 (0.78, 1.30)   | 0.93 (0.74, 1.18)           |
| <b>Complex Chronic Conditions</b> (Referent: 1 CCC)                                               |                                                                                                                       |                     |                          |                           |                       |                     |                             |
| ≥ 2 CCCs                                                                                          | 0.89 (0.62, 1.27)                                                                                                     | 0.97 (0.64, 1.46)   | 1.09 (0.78, 1.52)        | 1.12 (0.76, 1.65)         | 0.75 (0.33, 1.70)     | 0.85 (0.63, 1.13)   | 1.08 (0.83, 1.40)           |
| <b>Expected likelihood of severe health effects due to COVID-19</b> (Referent: Not at all likely) |                                                                                                                       |                     |                          |                           |                       |                     |                             |
| A little likely, Somewhat likely                                                                  | 1.8 (1.26, 2.58)*                                                                                                     | 1.08 (0.71, 1.64)   | 1.18 (0.85, 1.66)        | 1.15 (0.78, 1.68)         | 0.91 (0.41, 2.00)     | 0.99 (0.75, 1.30)   | 1.08 (0.84, 1.38)           |
| Very likely, Extremely likely                                                                     | 1.58 (0.94, 2.68)                                                                                                     | 1.06 (0.58, 1.92)   | 0.91 (0.54, 1.53)        | 0.83 (0.45, 1.54)         | 0.99 (0.33, 2.95)     | 0.98 (0.63, 1.53)   | 1.37 (0.93, 2.03)           |
| <b>Hospital Encounters in 2020</b> (Referent: 0)                                                  |                                                                                                                       |                     |                          |                           |                       |                     |                             |
| ≥ 1 Hospital encounter                                                                            | 0.88 (0.58, 1.34)                                                                                                     | 1.46 (0.94, 2.27)   | 1.18 (0.81, 1.73)        | 1.02 (0.65, 1.60)         | 1.04 (0.43, 2.51)     | 1.19 (0.86, 1.66)   | 0.84 (0.62, 1.14)           |

<sup>1</sup>In response to “How much do you trust each of these sources to provide correct information about COVID 19 as it relates to your child?”, trust is dichotomized as High = “A great deal” and Less = “Not at all”, “A little”, “Somewhat”, and “Don’t Know”

<sup>2</sup>The ‘Public Insurances’ category includes participants with both public and private insurance. The ‘Other Insurances’ category includes participants who selected “Does not have health insurance”, “Don’t Know”, or “Prefer not to answer.”

\*Significant Association

<https://doi.org/10.1371/journal.pone.0305553.t004>

role in ongoing mitigation. Because differences in vaccine and test perceptions may contribute to health disparities, vulnerable populations deserve ongoing attention. In our study, the combination of both medical complexity and household LOE likely represents a uniquely vulnerable population. Our hypothesis that LOE status would have associations with vaccine and test perceptions that may promote disparities in COVID-19 outcomes was partially confirmed. A concerning observation is that households with LOE more often overinterpreted their child's safety in the community following a negative test.

Family awareness of their child's vulnerability may explain why vaccine intentions in our respondents (80%) were much higher than the general US child population, where only 28% of parents reported high vaccine intentions [33]. Our results also differ from studies in which LOE was associated with lower vaccine intentions and uptake [15, 36]. We speculate that CMC's health vulnerabilities may explain uniformly higher vaccination rates for CMC, even amongst linguistically diverse populations. Families may be motivated by their child's higher risk of hospitalization and severe COVID-19 [8, 21, 25], as well as greater consequences from pandemic public health measures that can reduce health care access [37, 38]. Alternatively, as we did not have a measure of English proficiency, it is possible that disparities may have been observed if language proficiency rather than household language had been assessed [39]. In addition, vaccine intentions may be linked to sociodemographic and cultural factors not accounted for in our analysis [40, 41].

Although vaccine intentions of caregivers increased from 65% in Summer 2021 [32] to 80% in Spring 2022, opportunities remain to improve vaccination rates. Despite continually updated vaccine recommendations with contemporary vaccine formulations, COVID-19 vaccine hesitancy exists [42, 43] and the majority of children are not currently up to date [44]. It is plausible that vaccine intentions have shifted amidst booster recommendations, and researchers should explore whether households with LOE have developed disparities as this population may require distinct solutions [45].

In contrast to high vaccination intentions at the time of the study, interpretation of COVID-19 test results illustrated more variability by household language. COVID-19 testing will likely remain an important mitigation tool for the foreseeable future, and growing reliance on at-home testing places greater importance on family interpretation of results [46]. Conducting and interpreting at-home tests is a complicated process [47]. It is plausible that testing procedures are even more challenging for individuals with LOE. For example, families with LOE are known to experience comprehension challenges in medical encounters and reading prescription medication labels [48].

Our results suggest that in households with LOE, families of CMC report important differences in interpretation of COVID-19 test results for negative results. Interpreting negative COVID-19 tests is particularly important considering the known limitations of antigen test performance [49]. In fact, CMC families have expressed concern that a negative test may provide a false sense of security for their high-risk child [50]. This observation is consistent with our results, i.e., households with LOE may be over-interpreting their child's safety after a negative test since they more often perceived that their child can be around others without getting the virus from them after a negative test. It is conceivable that such differences may contribute to disparities in COVID-19 outcomes.

To influence public health pandemic knowledge and behaviors, messaging through trusted sources is important, and trusted information sources appear to differ across populations. We were surprised to observe that households with LOE reported higher trust in the government than non-LOE households. Other research evaluating trust in the government for COVID-19 information is mixed, with some studies demonstrating overall low trust in the White House for COVID-19 information [51] and others finding governmental websites as the most trusted

source of information [52]. Our survey did not distinguish between local public health departments, state and federal governmental agencies. Delineating this in future studies may identify the most trusted sources for LOE families. Although trust in the government was higher among households with LOE, it was still relatively low overall, and exploring other avenues of COVID-19 messaging is warranted.

The highest level of caregiver trust for COVID-19 information was seen in health care providers. Given the absence of high trust in other sources queried, the duty and stakes are high for clinicians to deliver accurate information effectively, including for linguistically and culturally diverse populations [2, 4]. Trust in health care providers has been linked to increased vaccine uptake [33, 53, 54], with parents reporting increased likelihood of COVID-19 vaccination if their child's healthcare provider recommended it [55]. Given the high frequency of health care encounters among CMC [56], opportunities exist for public health education during clinical care. In fact, CMC assisted by technology (e.g., ventilation via tracheostomy) were more likely to receive the COVID-19 vaccine when counseled by primary care provider or subspecialist [57].

Finally, despite observing relatively few disparities in our analysis, this topic requires continued focus. Navigating the complexity of changing COVID-19 public health recommendations and vaccine schedules is likely an obstacle for LOE families [58, 59]. Prior studies have found COVID-19 media are typically provided in only a few languages and people speaking LOE have noted inconsistent and sometimes discriminatory messages [60, 61]. Providing educational material with culturally appropriate terminology in the patient's language is one way of improving equitable access to COVID-19 information [62]. In addition, studies have demonstrated that even when COVID-19 information is communicated in a non-English language, the information provided is often inferior [63]. Provider education on effective communication and language service use [64, 65] along with further research dedicated to delineating best practices in communicating COVID-19 information to people who speak language other than English is needed.

## Limitations

Our study is subject to several limitations. This is a single-center study in the Midwest; therefore, results may not generalize to other linguistically diverse regions and populations. While the proportion of LOE households in our study is similar to our region [66], the survey response rate was 49% and suggests the respondent sample likely does not represent all LOE households in our region. The small sample size of LOE households reduces the power of the study to explore more nuanced sub-analyses, such as whether the results differed based on specific LOE. The survey was only available in English and Spanish. Results may have differed if we had offered the survey in additional languages, as some questions such as those regarding test perceptions may be confusing when translated into different languages. All non-English languages were evaluated together, and due to limited power and the large number of additional languages, we were unable to assess for language-related associations connected to social norms, cultural and political influences, etc. We cannot account for potential social desirability bias in family-reported pandemic perceptions and possible selection bias of caregivers more engaged in healthcare being more likely to complete the survey. Our study assessed families with household language other than English, but did not assess English language proficiency or multilingual households. Finally, the measures were family-reported and standardized across all RADx-UP programs. We could not confirm vaccine histories or distinguish antigen or polymerase chain reaction COVID-19 test perceptions.

## Conclusion

This cross-sectional survey of CMC caregivers demonstrated high COVID-19 vaccine intentions for households with and without LOE. However, households with LOE interpreted negative COVID-19 tests in ways that overestimated child safety compared to households with LOE. Future research should explore whether such differences contribute to disparities in COVID-19 outcomes. Since sources of trust for pandemic information differed based on household language, targeted public health messaging strategies should leverage the most trusted sources for specific populations. Addressing language-based disparities in culturally appropriate ways is critical to the COVID-19 and future pandemic response.

## Supporting information

**S1 Table. Caregiver and child demographic characteristics by response status,  $n = 3080$ .** (DOCX)

**S2 Table. Adjusted odds ratio of primary outcomes with and without propensity score inverse probability weighting for likelihood of survey response.** (DOCX)

## Author Contributions

**Conceptualization:** Laura P. Chen, Kristina Singh-Verdeflor, Michelle M. Kelly, Daniel J. Sklansky, Kristin A. Shadman, M. Bruce Edmonson, Qianqian Zhao, Gregory P. DeMuri, Ryan J. Coller.

**Data curation:** Kristina Singh-Verdeflor.

**Formal analysis:** Kristina Singh-Verdeflor.

**Funding acquisition:** Ryan J. Coller.

**Investigation:** Michelle M. Kelly, Daniel J. Sklansky, Kristin A. Shadman, M. Bruce Edmonson, Qianqian Zhao, Gregory P. DeMuri, Ryan J. Coller.

**Supervision:** Gregory P. DeMuri, Ryan J. Coller.

**Visualization:** Laura P. Chen, Kristina Singh-Verdeflor.

**Writing – original draft:** Laura P. Chen.

**Writing – review & editing:** Laura P. Chen, Kristina Singh-Verdeflor, Michelle M. Kelly, Daniel J. Sklansky, Kristin A. Shadman, M. Bruce Edmonson, Qianqian Zhao, Gregory P. DeMuri, Ryan J. Coller.

## References

1. Boserup B, McKenney M, Elkbuli A. Disproportionate Impact of COVID-19 Pandemic on Racial and Ethnic Minorities. *Am Surg*. 2020; 86(12):1615–22. <https://doi.org/10.1177/0003134820973356> PMID: 33231496
2. Ortega P, Martinez G, Diamond L. Language and Health Equity during COVID-19: Lessons and Opportunities. *J Health Care Poor Underserved*. 2020; 31(4):1530–5. <https://doi.org/10.1353/hpu.2020.0114> PMID: 33416734
3. Romano SD, Blackstock AJ, Taylor EV, El Burai Felix S, Adjei S, Singleton CM, et al. Trends in Racial and Ethnic Disparities in COVID-19 Hospitalizations, by Region—United States, March–December 2020. *MMWR Morb Mortal Wkly Rep*. 2021; 70(15):560–5. <https://doi.org/10.15585/mmwr.mm7015e2> PMID: 33857068

4. Valier MR, Elam-Evans LD, Mu Y, Santibanez TA, Yankey D, Zhou T, et al. Racial and Ethnic Differences in COVID-19 Vaccination Coverage Among Children and Adolescents Aged 5–17 Years and Parental Intent to Vaccinate Their Children—National Immunization Survey-Child COVID Module, United States, December 2020–September 2022. *MMWR Morb Mortal Wkly Rep.* 2023; 72(1):1–8. <https://doi.org/10.15585/mmwr.mm7201a1> PMID: 36602930
5. Tai DBG, Shah A, Doubeni CA, Sia IG, Wieland ML. The Disproportionate Impact of COVID-19 on Racial and Ethnic Minorities in the United States. *Clin Infect Dis.* 2021; 72(4):703–6. <https://doi.org/10.1093/cid/ciaa815> PMID: 32562416
6. Kim L, Whitaker M, O'Halloran A, Kambhampati A, Chai SJ, Reingold A, et al. Hospitalization Rates and Characteristics of Children Aged <18 Years Hospitalized with Laboratory-Confirmed COVID-19—COVID-NET, 14 States, March 1–July 25, 2020. *MMWR Morb Mortal Wkly Rep.* 2020; 69(32):1081–8.
7. Tsankov BK, Allaire JM, Irvine MA, Lopez AA, Sauve LJ, Vallance BA, et al. Severe COVID-19 Infection and Pediatric Comorbidities: A Systematic Review and Meta-Analysis. *Int J Infect Dis.* 2021; 103:246–56. <https://doi.org/10.1016/j.ijid.2020.11.163> PMID: 33227520
8. Shekerdemian LS, Mahmood NR, Wolfe KK, Riggs BJ, Ross CE, McKiernan CA, et al. Characteristics and Outcomes of Children With Coronavirus Disease 2019 (COVID-19) Infection Admitted to US and Canadian Pediatric Intensive Care Units. *JAMA Pediatr.* 2020; 174(9):868–73. <https://doi.org/10.1001/jamapediatrics.2020.1948> PMID: 32392288
9. Ho M, Most ZM, Perl TM, Diaz MI, Casazza JA, Saleh S, et al. Incidence and Risk Factors for Severe Outcomes in Pediatric Patients With COVID-19. *Hosp Pediatr.* 2023; 13(5):450–62. <https://doi.org/10.1542/hpeds.2022-006833> PMID: 37038904
10. DeBiasi RL, Song X, Delaney M, Bell M, Smith K, Pershad J, et al. Severe Coronavirus Disease-2019 in Children and Young Adults in the Washington, DC, Metropolitan Region. *J Pediatr.* 2020; 223:199–203 e1. <https://doi.org/10.1016/j.jpeds.2020.05.007> PMID: 32405091
11. Graff K, Smith C, Silveira L, Jung S, Curran-Hays S, Jarjour J, et al. Risk Factors for Severe COVID-19 in Children. *Pediatr Infect Dis J.* 2021; 40(4):e137–e45. <https://doi.org/10.1097/INF.0000000000003043> PMID: 33538539
12. Yeboah D, McDaniel C, Lion KC. Language Matters: Why We Should Reconsider the Term "Limited English Proficiency". *Hosp Pediatr.* 2023; 13(1):e11–e3. <https://doi.org/10.1542/hpeds.2022-007014> PMID: 36464981
13. Cohen-Cline H, Li HF, Gill M, Rodriguez F, Hernandez-Boussard T, Wolberg H, et al. Major disparities in COVID-19 test positivity for patients with non-English preferred language even after accounting for race and social factors in the United States in 2020. *BMC Public Health.* 2021; 21(1):2121. <https://doi.org/10.1186/s12889-021-12171-z> PMID: 34794421
14. Khanijahani A, Iezadi S, Gholipour K, Azami-Aghdash S, Naghibi D. A systematic review of racial/ethnic and socioeconomic disparities in COVID-19. *Int J Equity Health.* 2021; 20(1):248. <https://doi.org/10.1186/s12939-021-01582-4> PMID: 34819081
15. Himmelstein J, Himmelstein DU, Woolhandler S, Dickman S, Cai C, McCormick D. COVID-19-Related Care for Hispanic Elderly Adults With Limited English Proficiency. *Ann Intern Med.* 2022; 175(1):143–5. <https://doi.org/10.7326/M21-2900> PMID: 34698514
16. Kim HN, Lan KF, Nkyekyer E, Neme S, Pierre-Louis M, Chew L, et al. Assessment of Disparities in COVID-19 Testing and Infection Across Language Groups in Seattle, Washington. *JAMA Netw Open.* 2020; 3(9):e2021213.
17. Karmakar M, Lantz PM, Tipirneni R. Association of Social and Demographic Factors With COVID-19 Incidence and Death Rates in the US. *JAMA Netw Open.* 2021; 4(1):e2036462. <https://doi.org/10.1001/jamanetworkopen.2020.36462> PMID: 33512520
18. Wiersinga WJ, Rhodes A, Cheng AC, Peacock SJ, Prescott HC. Pathophysiology, Transmission, Diagnosis, and Treatment of Coronavirus Disease 2019 (COVID-19): A Review. *JAMA.* 2020; 324(8):782–93. <https://doi.org/10.1001/jama.2020.12839> PMID: 32648899
19. Cohen E, Kuo DZ, Agrawal R, Berry JG, Bhagat SK, Simon TD, et al. Children with medical complexity: an emerging population for clinical and research initiatives. *Pediatrics.* 2011; 127(3):529–38. <https://doi.org/10.1542/peds.2010-0910> PMID: 21339266
20. Gleason J, Ross W, Fossi A, Blonsky H, Tobias J, Stephens M. The Devastating Impact of Covid-19 on Individuals with Intellectual Disabilities in the United States. *Catalyst non-issue content.* 2021; 2(2).
21. Wong CA, Ming D, Maslow G, Gifford EJ. Mitigating the Impacts of the COVID-19 Pandemic Response on At-Risk Children. *Pediatrics.* 2020; 146(1). <https://doi.org/10.1542/peds.2020-0973> PMID: 32317311
22. Fernandes DM, Oliveira CR, Guerguis S, Eisenberg R, Choi J, Kim M, et al. Severe Acute Respiratory Syndrome Coronavirus 2 Clinical Syndromes and Predictors of Disease Severity in Hospitalized Children and Youth. *J Pediatr.* 2021; 230:23–31 e10.

23. Martin B, DeWitt PE, Russell S, Anand A, Bradwell KR, Bremer C, et al. Characteristics, Outcomes, and Severity Risk Factors Associated With SARS-CoV-2 Infection Among Children in the US National COVID Cohort Collaborative. *JAMA Netw Open*. 2022; 5(2):e2143151. <https://doi.org/10.1001/jamanetworkopen.2021.43151> PMID: 35133437
24. Mitchell SM. True Resilience: A Look Inside COVID's Effect on Children with Medical Complexity and Their Families. *Curr Pediatr Rep*. 2021; 9(4):171–7. <https://doi.org/10.1007/s40124-021-00254-9> PMID: 34659915
25. Kompaniyets L, Agathis NT, Nelson JM, Preston LE, Ko JY, Belay B, et al. Underlying Medical Conditions Associated With Severe COVID-19 Illness Among Children. *JAMA Netw Open*. 2021; 4(6):e2111182. <https://doi.org/10.1001/jamanetworkopen.2021.11182> PMID: 34097050
26. Eneriz-Wiemer M, Sanders LM, Barr DA, Mendoza FS. Parental limited English proficiency and health outcomes for children with special health care needs: a systematic review. *Acad Pediatr*. 2014; 14(2):128–36. <https://doi.org/10.1016/j.acap.2013.10.003> PMID: 24602575
27. Yu SM, Singh GK. Household language use and health care access, unmet need, and family impact among CSHCN. *Pediatrics*. 2009; 124 Suppl 4:S414–9. <https://doi.org/10.1542/peds.2009-1255M> PMID: 19948607
28. Ngui EM, Flores G. Satisfaction with care and ease of using health care services among parents of children with special health care needs: the roles of race/ethnicity, insurance, language, and adequacy of family-centered care. *Pediatrics*. 2006; 117(4):1184–96. <https://doi.org/10.1542/peds.2005-1088> PMID: 16585314
29. Strickland BB, Singh GK, Kogan MD, Mann MY, van Dyck PC, Newacheck PW. Access to the medical home: new findings from the 2005–2006 National Survey of Children with Special Health Care Needs. *Pediatrics*. 2009; 123(6):e996–1004. <https://doi.org/10.1542/peds.2008-2504> PMID: 19482751
30. NIH RADx-UP Common Data Elements <https://radx-up.org/research/cdes/>.
31. Feudtner C, Feinstein JA, Zhong W, Hall M, Dai D. Pediatric complex chronic conditions classification system version 2: updated for ICD-10 and complex medical technology dependence and transplantation. *BMC Pediatr*. 2014; 14:199. <https://doi.org/10.1186/1471-2431-14-199> PMID: 25102958
32. Howell KD, Kelly MM, DeMuri GP, McBride JA, Katz B, Edmonson MB, et al. COVID-19 Vaccination Intentions for Children With Medical Complexity. *Hosp Pediatr*. 2022; 12(9):e295–e302. <https://doi.org/10.1542/hpeds.2022-006544> PMID: 36039687
33. Szilagyi PG, Shah MD, Delgado JR, Thomas K, Vizueta N, Cui Y, et al. Parents' Intentions and Perceptions About COVID-19 Vaccination for Their Children: Results From a National Survey. *Pediatrics*. 2021; 148(4).
34. Austin PC. An Introduction to Propensity Score Methods for Reducing the Effects of Confounding in Observational Studies. *Multivariate Behav Res*. 2011; 46(3):399–424. <https://doi.org/10.1080/00273171.2011.568786> PMID: 21818162
35. Collier RJ, Kelly MM, Eickhoff J, Johnson SB, Zhao Q, Warner G, et al. School Attendance Decisions for Children With Medical Complexity During COVID-19. *Pediatrics*. 2023; 152(Suppl 1). <https://doi.org/10.1542/peds.2022-060352K> PMID: 37394510
36. Quadri NS, Knowlton G, Vazquez Benitez G, Ehresmann KR, LaFrance AB, DeFor TA, et al. Evaluation of Preferred Language and Timing of COVID-19 Vaccine Uptake and Disease Outcomes. *JAMA Netw Open*. 2023; 6(4):e237877. <https://doi.org/10.1001/jamanetworkopen.2023.7877> PMID: 37043199
37. Brisca G, Vagelli G, Tagliarini G, Rotulo A, Pirlo D, Romanengo M, et al. The impact of COVID-19 lockdown on children with medical complexity in pediatric emergency department. *Am J Emerg Med*. 2021; 42:225–7. <https://doi.org/10.1016/j.ajem.2020.11.066> PMID: 33279328
38. Baumbusch J, Lloyd JEV, Lamden-Bennett SR, Ou C. The unintended consequences of COVID-19 public health measures on health care for children with medical complexity. *Child Care Health Dev*. 2022; 48(6):970–8. <https://doi.org/10.1111/cch.12968> PMID: 35043430
39. Flores G, Abreu M, Tomany-Korman SC. Limited english proficiency, primary language at home, and disparities in children's health care: how language barriers are measured matters. *Public Health Rep*. 2005; 120(4):418–30. <https://doi.org/10.1177/003335490512000409> PMID: 16025722
40. Lin C, Tu P, Beitsch LM. Confidence and Receptivity for COVID-19 Vaccines: A Rapid Systematic Review. *Vaccines (Basel)*. 2020; 9(1). <https://doi.org/10.3390/vaccines9010016> PMID: 33396832
41. Terry E, Carlledge S, Damery S, Greenfield S. Factors associated with COVID-19 vaccine intentions during the COVID-19 pandemic; a systematic review and meta-analysis of cross-sectional studies. *BMC Public Health*. 2022; 22(1):1667. <https://doi.org/10.1186/s12889-022-14029-4> PMID: 36056325
42. Lazarus JV, Wyka K, White TM, Picchio CA, Gostin LO, Larson HJ, et al. A survey of COVID-19 vaccine acceptance across 23 countries in 2022. *Nat Med*. 2023; 29(2):366–75. <https://doi.org/10.1038/s41591-022-02185-4> PMID: 36624316

43. Yanto TA, Lugito NPH, Hwei LRY, Virliani C, Octavius GS. Prevalence and Determinants of COVID-19 Vaccine Acceptance in South East Asia: A Systematic Review and Meta-Analysis of 1,166,275 Respondents. *Trop Med Infect Dis.* 2022; 7(11). <https://doi.org/10.3390/tropicalmed7110361> PMID: 36355903
44. COVID-19 Vaccination Coverage and Vaccine Confidence Among Children CDC.gov2023 <https://www.cdc.gov/vaccines/imz-managers/coverage/covidvaxview/interactive/children.html>.
45. Almalki OS, Alfayez OM, Al Yami MS, Asiri YA, Almohammed OA. Parents' Hesitancy to Vaccinate Their 5-11-Year-Old Children Against COVID-19 in Saudi Arabia: Predictors From the Health Belief Model. *Front Public Health.* 2022; 10:842862. <https://doi.org/10.3389/fpubh.2022.842862> PMID: 35433579
46. Sherby MR, Kalb LG, Coller RJ, DeMuri GP, Butteris S, Foxe JJ, et al. Supporting COVID-19 School Safety for Children With Disabilities and Medical Complexity. *Pediatrics.* 2022; 149(12 Suppl 2). <https://doi.org/10.1542/peds.2021-054268H> PMID: 34737172
47. Barton HJ, Werner NE, Morgen M, DeMuri GP, Kelly MM, Wald ER, et al. Task Analysis of In-Home SARS-CoV-2 Rapid Antigen Testing by Families. *Pediatrics.* 2022; 150(2). <https://doi.org/10.1542/peds.2022-056681> PMID: 35610754
48. Wilson E, Chen AH, Grumbach K, Wang F, Fernandez A. Effects of limited English proficiency and physician language on health care comprehension. *J Gen Intern Med.* 2005; 20(9):800–6. <https://doi.org/10.1111/j.1525-1497.2005.0174.x> PMID: 16117746
49. Frediani JK, Levy JM, Rao A, Bassit L, Figueroa J, Vos MB, et al. Multidisciplinary assessment of the Abbott BinaxNOW SARS-CoV-2 point-of-care antigen test in the context of emerging viral variants and self-administration. *Sci Rep.* 2021; 11(1):14604. <https://doi.org/10.1038/s41598-021-94055-1> PMID: 34272449
50. Jolliff A, Werner NE, Barton HJ, Howell KD, Kelly MM, Morgen M, et al. Caregiver perceptions of in-home COVID-19 testing for children with medical complexity: a qualitative study. *BMC Pediatr.* 2022; 22(1):533. <https://doi.org/10.1186/s12887-022-03550-5> PMID: 36076181
51. Latkin CA, Dayton L, Strickland JC, Colon B, Rimal R, Boodram B. An Assessment of the Rapid Decline of Trust in US Sources of Public Information about COVID-19. *J Health Commun.* 2020; 25(10):764–73. <https://doi.org/10.1080/10810730.2020.1865487> PMID: 33719879
52. Ali SH, Foreman J, Tozan Y, Capasso A, Jones AM, DiClemente RJ. Trends and Predictors of COVID-19 Information Sources and Their Relationship With Knowledge and Beliefs Related to the Pandemic: Nationwide Cross-Sectional Study. *JMIR Public Health Surveill.* 2020; 6(4):e21071. <https://doi.org/10.2196/21071> PMID: 32936775
53. Brewer NT. What Works to Increase Vaccination Uptake. *Acad Pediatr.* 2021; 21(4S):S9–S16. <https://doi.org/10.1016/j.acap.2021.01.017> PMID: 33958099
54. Baack BN, Abad N, Yankey D, Kahn KE, Razzaghi H, Brookmeyer K, et al. COVID-19 Vaccination Coverage and Intent Among Adults Aged 18–39 Years—United States, March–May 2021. *MMWR Morb Mortal Wkly Rep.* 2021; 70(25):928–33. <https://doi.org/10.15585/mmwr.mm7025e2> PMID: 34166337
55. Byrne A, Thompson LA, Filipp SL, Ryan K. COVID-19 vaccine perceptions and hesitancy amongst parents of school-aged children during the pediatric vaccine rollout. *Vaccine.* 2022; 40(46):6680–7. <https://doi.org/10.1016/j.vaccine.2022.09.090> PMID: 36220714
56. Cohen E, Berry JG, Camacho X, Anderson G, Wodchis W, Guttman A. Patterns and costs of health care use of children with medical complexity. *Pediatrics.* 2012; 130(6):e1463–70. <https://doi.org/10.1542/peds.2012-0175> PMID: 23184117
57. Capusan KY, Rebaza AP, Santiago MT, Quizon A. Parental Perception and Barriers Regarding COVID-19 Vaccination in Technology Dependent Children. *J Pediatr Health Care.* 2023. <https://doi.org/10.1016/j.pedhc.2023.05.002> PMID: 37227325
58. Evola CM, Repas SM, Dickman JM, George MM, Viaud-Murat E, Hershberger PP, et al. Perceptions of the SARS-CoV2 pandemic: a small comparative survey analysis between language preference populations in a United States community health center. *Pathog Glob Health.* 2023; 117(2):203–11. <https://doi.org/10.1080/20477724.2022.2088500> PMID: 35712873
59. Goyal L, Zapata M, Ajmera K, Chourasia P, Pandit R, Pandit T. A Hitchhiker's Guide to Worldwide COVID-19 Vaccinations: A Detailed Review of Monovalent and Bivalent Vaccine Schedules, COVID-19 Vaccine Side Effects, and Effectiveness Against Omicron and Delta Variants. *Cureus.* 2022; 14(10):e29837. <https://doi.org/10.7759/cureus.29837> PMID: 36204257
60. Kucirek NK, Thomas NJ, Norman JS, Athavale P, Jaradeh K, Hsiang EY, et al. Stories from COVID-19 Reveal Hospitalized Patients with Limited English Proficiency Have Always Been Uniquely Prone to Social Isolation. *J Gen Intern Med.* 2021; 36(3):786–9. <https://doi.org/10.1007/s11606-020-06383-z> PMID: 33409888
61. SteelFisher GK, Caporello HL, Lubell KM, Ben-Porath EN, Green AR, Luo F, et al. Getting Critical Information During the COVID-19 Pandemic: Experiences of Spanish and Chinese Speakers With Limited

English Proficiency. *Health Secur.* 2022; 20(4):273–85. <https://doi.org/10.1089/hs.2021.0218> PMID: 35771967

62. Fuchs JR, Fuchs JW, Tietz SE, Lum HD. Older adults with limited English proficiency need equitable COVID-19 vaccine access. *J Am Geriatr Soc.* 2021; 69(4):888–91. <https://doi.org/10.1111/jgs.17069> PMID: 33555042
63. Kusters IS, Gutierrez AM, Dean JM, Sommer M, Klyueva A. Spanish-Language Communication of COVID-19 Information Across US Local Health Department Websites. *J Racial Ethn Health Disparities.* 2022:1–8. <https://doi.org/10.1007/s40615-022-01428-x> PMID: 36227453
64. Taira BR, Kim K, Mody N. Hospital and Health System-Level Interventions to Improve Care for Limited English Proficiency Patients: A Systematic Review. *Jt Comm J Qual Patient Saf.* 2019; 45(6):446–58. <https://doi.org/10.1016/j.jcjq.2019.02.005> PMID: 30910471
65. Rajbhandari P, Glick AF, Brown MF, VanGeest J. Communication Training for Pediatric Hospitalists and its Impact on Clinical Practice with Families Using Languages Other than English. *Acad Pediatr.* 2023. <https://doi.org/10.1016/j.acap.2023.12.003> PMID: 38110055
66. State Immigration Data Profiles: Migration Policy Institute; <https://www.migrationpolicy.org/data/state-profiles/state/language/WI>.
